# Supplementary material
Source: PubMed Central journal article supplement (PMC8370718)

A

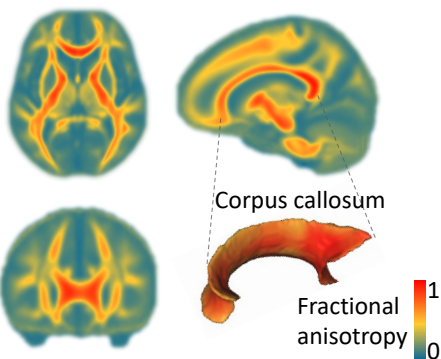

C

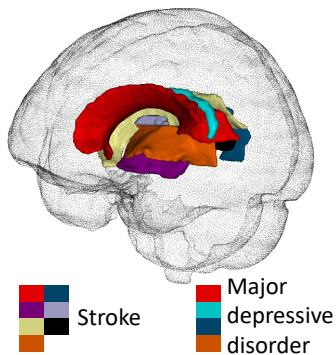

B

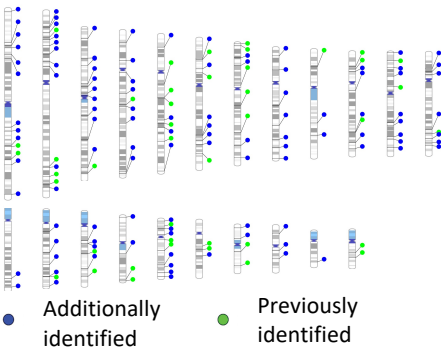

D

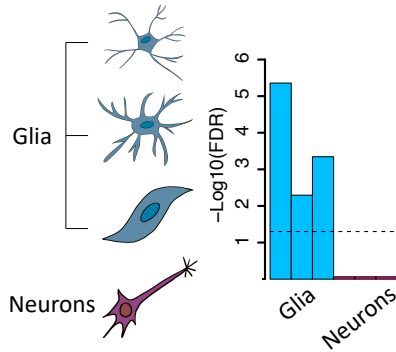

Supplement: NIHMS1700355-supplement-Figure_for_the_online_research_article.pdf [file NIHMS1700355-supplement-Figure_for_the_online_research_article.pdf]
